# Supplementary material
Source: MDPI journal article supplement (https://www.mdpi.com/2306-5729/8/7/119)

**Figure S1.** Total ion chromatogram (TIC) for each of the samples based on MS1. Each panel corresponds to the experiment: Erastin (A), ML210 (B) and BSO (C); spited by time points: baseline (0h), 24h, 48h.

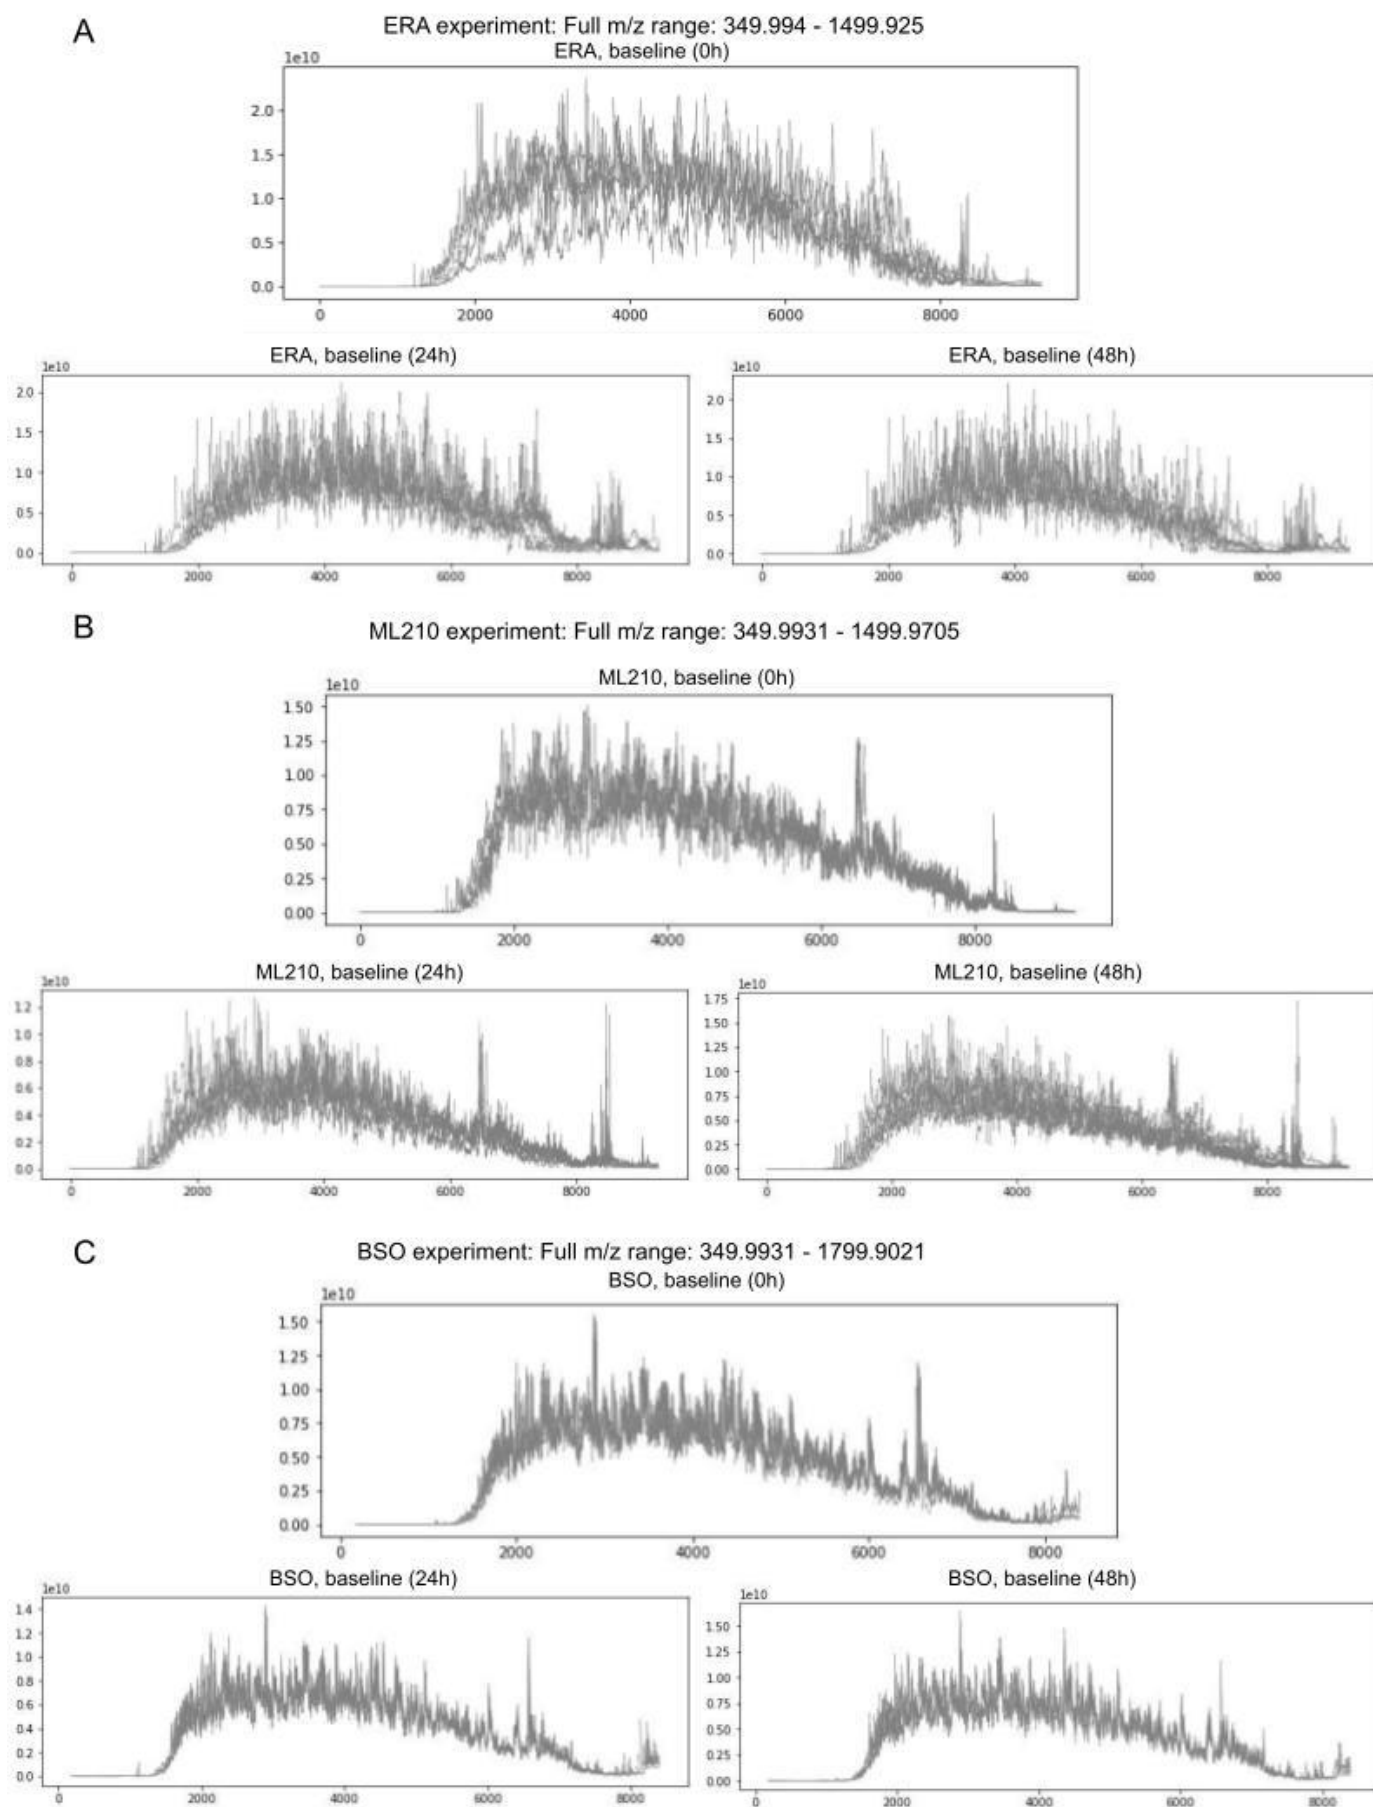

Supplement: s1 [file s1 › data-2371800-supplementary.pdf]
